# Supplementary material for: Reduced fluorenoazomethine based photoluminescence turn-on sensors for transition metal ions
Source: Royal Society of Chemistry journal article supplement (doi:10.1039/c4ra06528j), 2014-07-17
Supplement: c4ra06528j1.pdf [file c4ra06528j1.pdf]

## Supporting Information

### Reduced fluorenoazomethine based photoluminescence turn-on sensors for transition metal ions

Pradip Kr. Dutta, Snigdha Panda\*, Debangshu Chaudhuri\*, Sanjio S. Zade\*

*Department of Chemical Sciences,*

*Indian Institute of Science Education and Research Kolkata*

*PO: BCKV campus main office, Mohanpur 741252, Nadia, West Bengal, India*

*Email: [sanjiozade@iiserkol.ac.in](mailto:sanjiozade@iiserkol.ac.in), [dchaudhuri@iiserkol.ac.in](mailto:dchaudhuri@iiserkol.ac.in), [snigdha@iiserkol.ac.in](mailto:snigdha@iiserkol.ac.in)*

*Fax: +91-33-25873020*

#### Table of contents

| Sr. No. | Description                                                                                                                                                             | Page No. |
|---------|-------------------------------------------------------------------------------------------------------------------------------------------------------------------------|----------|
| 1       | Synthesis and characterization details                                                                                                                                  | S4-S5    |
| 2       | <b>Fig. S1</b> <sup>1</sup> H NMR spectrum of reduced podand <b>3</b> .                                                                                                 | S6       |
| 3       | <b>Fig. S2</b> <sup>13</sup> C NMR spectrum of reduced podand <b>3</b> .                                                                                                | S7       |
| 4       | <b>Fig. S3</b> <sup>1</sup> H NMR spectrum of reduced podand <b>4</b> .                                                                                                 | S8       |
| 5       | <b>Fig. S4</b> <sup>13</sup> C NMR spectrum of reduced podand <b>4</b> .                                                                                                | S9       |
| 6       | <b>Fig. S5</b> <sup>77</sup> Se NMR spectrum of reduced podand <b>4</b> .                                                                                               | S10      |
| 7       | <b>Fig. S6</b> Change in absorption spectra upon addition of (a) Fe(II), (b) Fe(III) and (c) Cu(II) solution in THF to the solution of reduced podand <b>3</b> (33 μM). | S11      |
| 8       | <b>Fig. S7</b> Fluorescence response following excitation at 360 nm from reduced podand <b>3</b> solution upon addition of (a) Fe(II), (b) Fe(III) and (c) Cu(II) ion   | S11-12   |

|    |                                                                                                                                                                                            |        |
|----|--------------------------------------------------------------------------------------------------------------------------------------------------------------------------------------------|--------|
|    | in THF.                                                                                                                                                                                    |        |
| 9  | <b>Fig. S8</b> Visual Changes in color after addition of aliquots of (a) Fe(II), (b) Fe(III) and (c) Cu(II) ion to the reduced podand <b>3</b> .                                           | S12    |
| 10 | <b>Fig. S9</b> Change in absorption spectra upon addition of (a) Fe(II), (b) Fe(III) and (c) Cu(II) solution in THF to the solution of reduced podand <b>4</b> (35 $\mu$ M).               | S12-13 |
| 11 | <b>Fig. S10</b> Fluorescence response following excitation at 350 nm from reduced podand <b>4</b> solution upon addition of (a) Co(II), (b) Fe(II), (c) Fe(III) and (d) Cu(II) ion in THF. | S13    |
| 12 | <b>Fig. S11</b> Visual Changes in color after addition of aliquots of (a) Co(II), (a) Fe(II), (b) Fe(III) and (c) Cu(II) ion to the reduced podand <b>4</b> .                              | S14    |
| 13 | <b>Fig. S12</b> Double reciprocal plot for the complexation of podand <b>3</b> and Co(II).                                                                                                 | S14    |
| 14 | <b>Fig. S13</b> Jobs plot of titration of <b>3</b> with Co(II) (where $X_h$ is the mole fraction of Co(II) and $\Delta I$ indicates the change of the Fluorescence).                       | S14    |
| 15 | <b>Fig. S14</b> Double reciprocal plot for the complexation of podand <b>3</b> and Fe(II).                                                                                                 | S15    |
| 16 | <b>Fig. S15</b> Jobs plot of titration of <b>3</b> with Fe(II) (where $X_h$ is the mole fraction of Fe(II) and $\Delta I$ indicates the change of the Fluorescence).                       | S15    |
| 17 | <b>Fig. S16</b> Double reciprocal plot for the complexation of podand <b>3</b> and Fe(III).                                                                                                | S16    |
| 18 | <b>Fig. S17</b> Jobs plot of titration of <b>3</b> with Fe(III) (where $X_h$ is the mole fraction of Fe(III) and $\Delta I$ indicates the change of the Fluorescence).                     | S16    |
| 19 | <b>Fig. S18</b> Double reciprocal plot for the complexation of podand <b>3</b> and Cu(II).                                                                                                 | S17    |
| 20 | <b>Fig. S19</b> Jobs plot of titration of <b>3</b> with Cu(II) (where $X_h$ is the mole fraction of Cu(II) and $\Delta I$ indicates the change of the Fluorescence).                       | S17    |

|    |                                                                                                                                                                        |     |
|----|------------------------------------------------------------------------------------------------------------------------------------------------------------------------|-----|
| 21 | <b>Fig. S20</b> Double reciprocal plot for the complexation of podand <b>4</b> and Co(II).                                                                             | S18 |
| 22 | <b>Fig. S21</b> Jobs plot of titration of <b>4</b> with Co(II) (where $X_h$ is the mole fraction of Co(II) and $\Delta I$ indicates the change of the Fluorescence).   | S18 |
| 23 | <b>Fig. S22</b> Double reciprocal plot for the complexation of podand <b>4</b> and Fe(II).                                                                             | S19 |
| 24 | <b>Fig. S23</b> Jobs plot of titration of <b>4</b> with Fe(II) (where $X_h$ is the mole fraction of Fe(II) and $\Delta I$ indicates the change of the Fluorescence).   | S29 |
| 25 | <b>Fig. S24</b> Double reciprocal plot for the complexation of podand <b>4</b> and Fe(III).                                                                            | S20 |
| 26 | <b>Fig. S25</b> Jobs plot of titration of <b>4</b> with Fe(III) (where $X_h$ is the mole fraction of Fe(III) and $\Delta I$ indicates the change of the Fluorescence). | S20 |
| 27 | <b>Fig. S26</b> Double reciprocal plot for the complexation of podand <b>4</b> and Cu(II).                                                                             | S21 |
| 28 | <b>Fig. S27</b> Jobs plot of titration of <b>4</b> with Cu(II) (where $X_h$ is the mole fraction of Cu(II) and $\Delta I$ indicates the change of the Fluorescence).   | 21  |

## Synthesis and characterization details

**General.** All the reagents were purchased from Aldrich / Merck and used without further purification. AR grade THF was passed through alumina to remove hydrogen peroxide and partial drying and kept over the molecular sieves. AR grade acetonitrile was distilled from P<sub>2</sub>O<sub>5</sub> and kept over molecular sieves. All optical measurements were carried out at room temperature. UV-vis spectra were recorded on a Hitachi U4100 spectrophotometer, with a quartz cuvette (path length, 1 cm). The fluorescence spectra were recorded with a Fluoromax-3 spectrofluorimeter. <sup>1</sup>H and <sup>13</sup>C NMR spectra were recorded on a JEOL-FT NMR-AL 400 MHz spectrophotometer using CDCl<sub>3</sub>/DMSO-d<sub>6</sub> as solvent and tetramethylsilane SiMe<sub>4</sub> as internal standards. UV-vis studies were performed in THF AR grade. Data are reported as follows: chemical shifts in ppm (δ), multiplicity (s=singlet, d=doublet, br=broad singlet, m= multiplet), coupling constants J (Hz), integration, and interpretation. Silica gel 60 (60-120 mesh) was used for column chromatography. Solutions of compounds **3**, and **4** and perchlorate salts were prepared in THF.

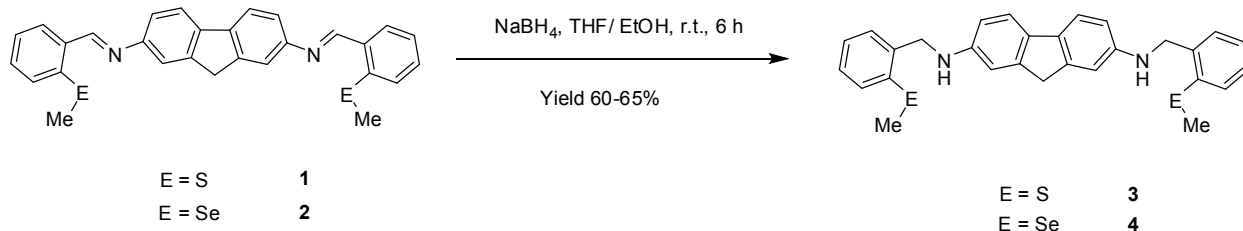

## Syntheses

**Compound 3:** Sodium borohydride (0.875 g, 23.12 mmol) was added portion-wise to compound **1**<sup>1</sup> (0.5 g, 1.08 mmol) in C<sub>2</sub>H<sub>5</sub>OH:THF mixture (1:1) at room temperature under inert atmosphere. After 6 hour stirring at room temperature, the solvent was evaporated and the residue washed with saturated brine solution and was extracted with DCM to get light yellowish crystalline solid. Yield: 313 mg (62%); Mp: 137.0 °C; <sup>1</sup>H NMR (400 MHz, CDCl<sub>3</sub>) δ 2.50 (s, 3H), 3.70 (s, 1H), 4.06 (br, 1H, NH), 4.42 (s, 2H), 6.60 (dd, 1H), 6.78 (s, 1H), 7.13 (m, 1H), 7.26 (m, 2H), 7.38 (d, 2H); <sup>13</sup>C NMR (100 MHz, CDCl<sub>3</sub>) δ 15.74, 36.99, 46.75, 109.74, 111.90, 119.10, 125.05, 125.63, 127.81, 128.15, 132.94, 137.02, 137.16, 144.01, 146.21; HRMS(ESI): [M]<sup>+</sup>: 468.1694 (calculated) 468.1633 (found).

Compound **4** was analogously prepared starting from **21**.

**Compound 4:** Light yellowish crystalline solid. Yield: 65%; Mp: 142.4 °C; <sup>1</sup>H NMR (400 MHz, CDCl<sub>3</sub>) δ 2.35 (s, 3H), 3.72 (s, 1H), 3.99 (br, 1H, NH), 4.42 (s, 2H), 6.61 (dd, 1H), 6.79 (s, 1H), 7.20 (m, 2H), 7.40 (m, 3H), <sup>13</sup>C NMR (100 MHz, CDCl<sub>3</sub>) δ 6.95, 37.00, 48.78, 109.75, 111.90, 119.12, 126.12, 128.02, 128.41, 129.63, 132.48, 133.01, 139.11, 144.01, 146.07; <sup>77</sup>Se NMR (95 MHz, CDCl<sub>3</sub>) δ 207.25; HRMS(ESI): [M]<sup>+</sup>: 564.0583 (calculated) 564.0563 (found).

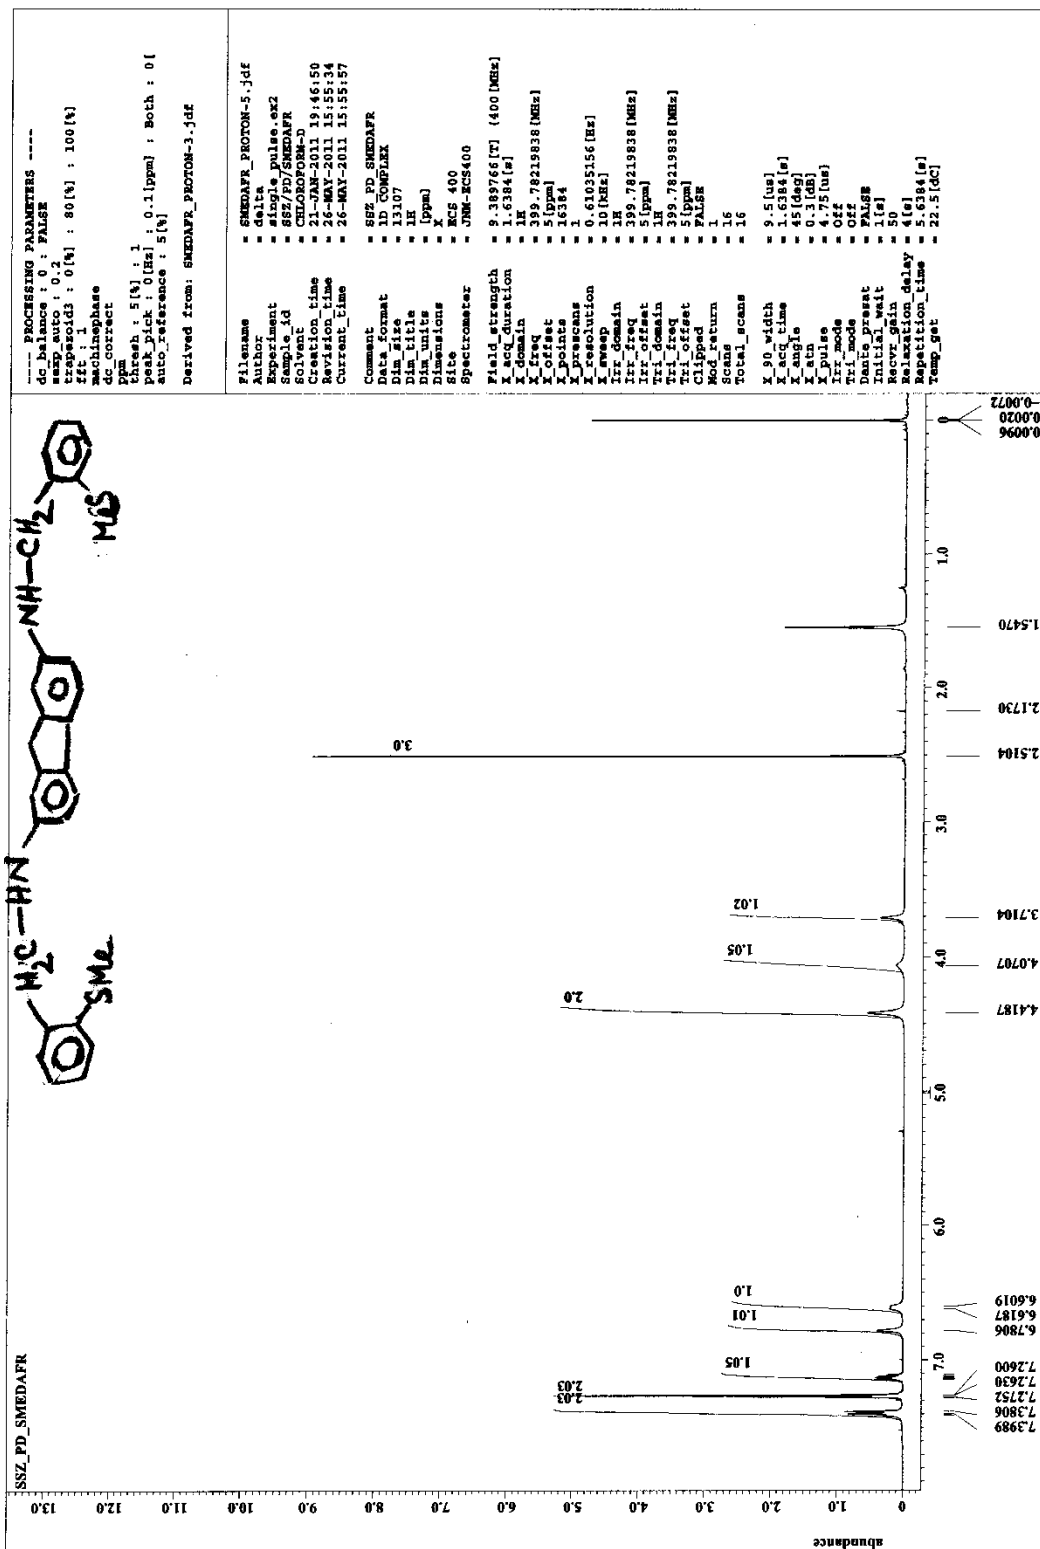

Fig. S1 <sup>1</sup>H NMR spectrum of reduced podand 3.

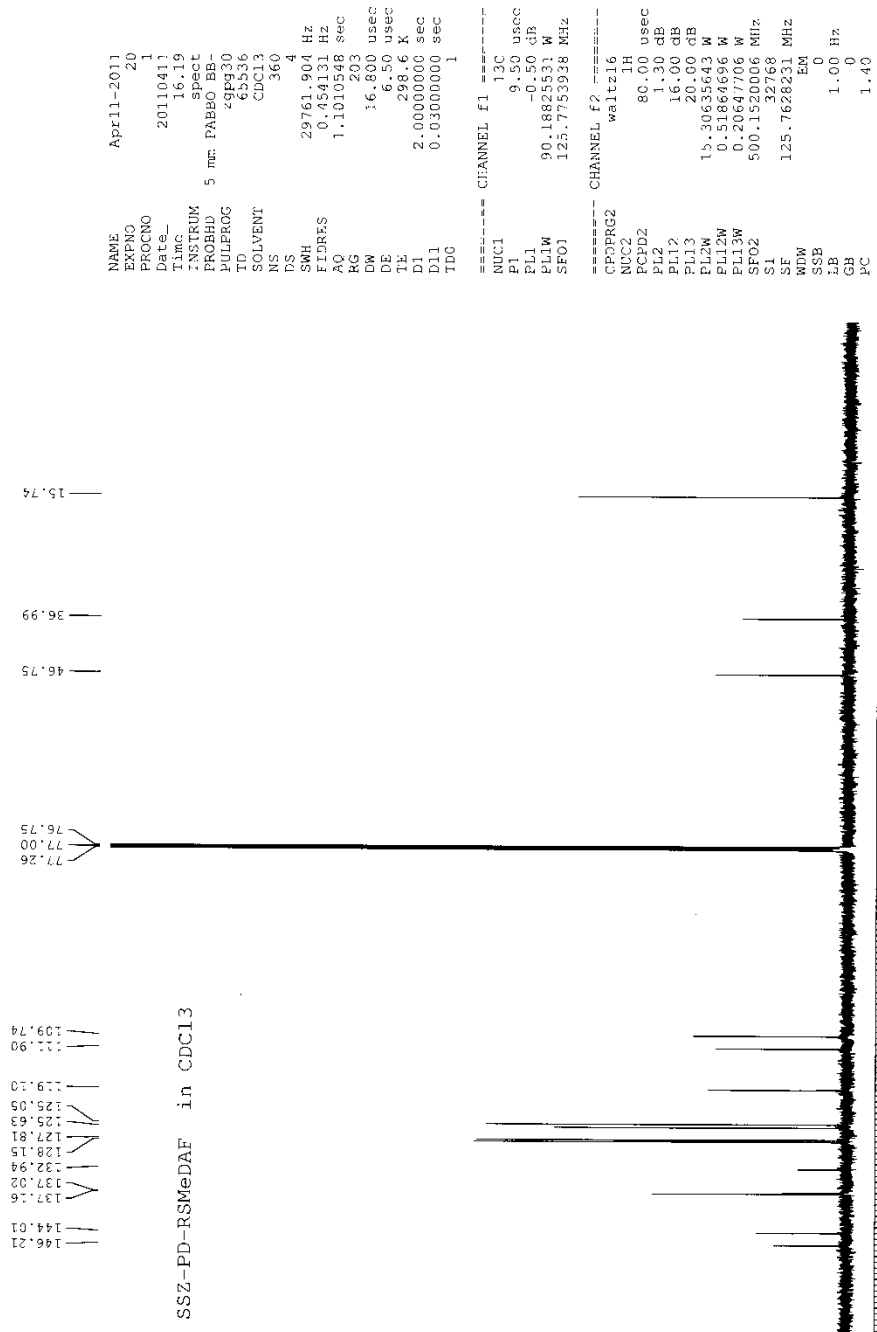

Fig. S2 <sup>13</sup>C NMR spectrum of reduced podand 3.

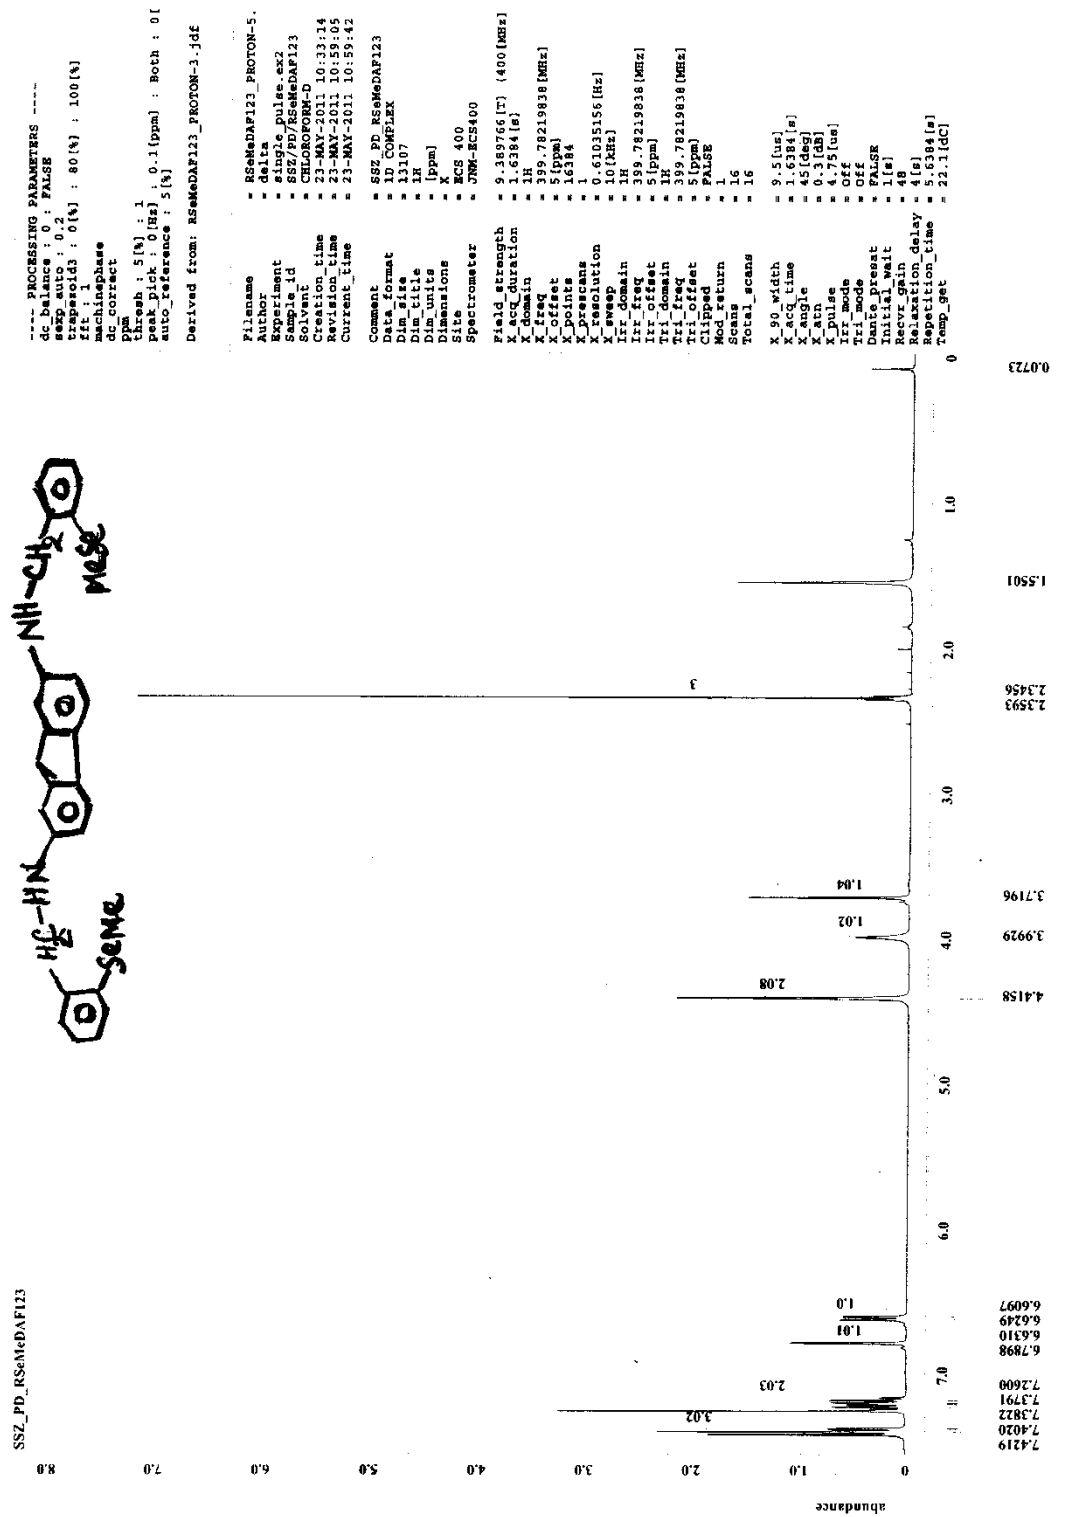

Fig. S3 <sup>1</sup>H NMR spectrum of reduced podand 4.



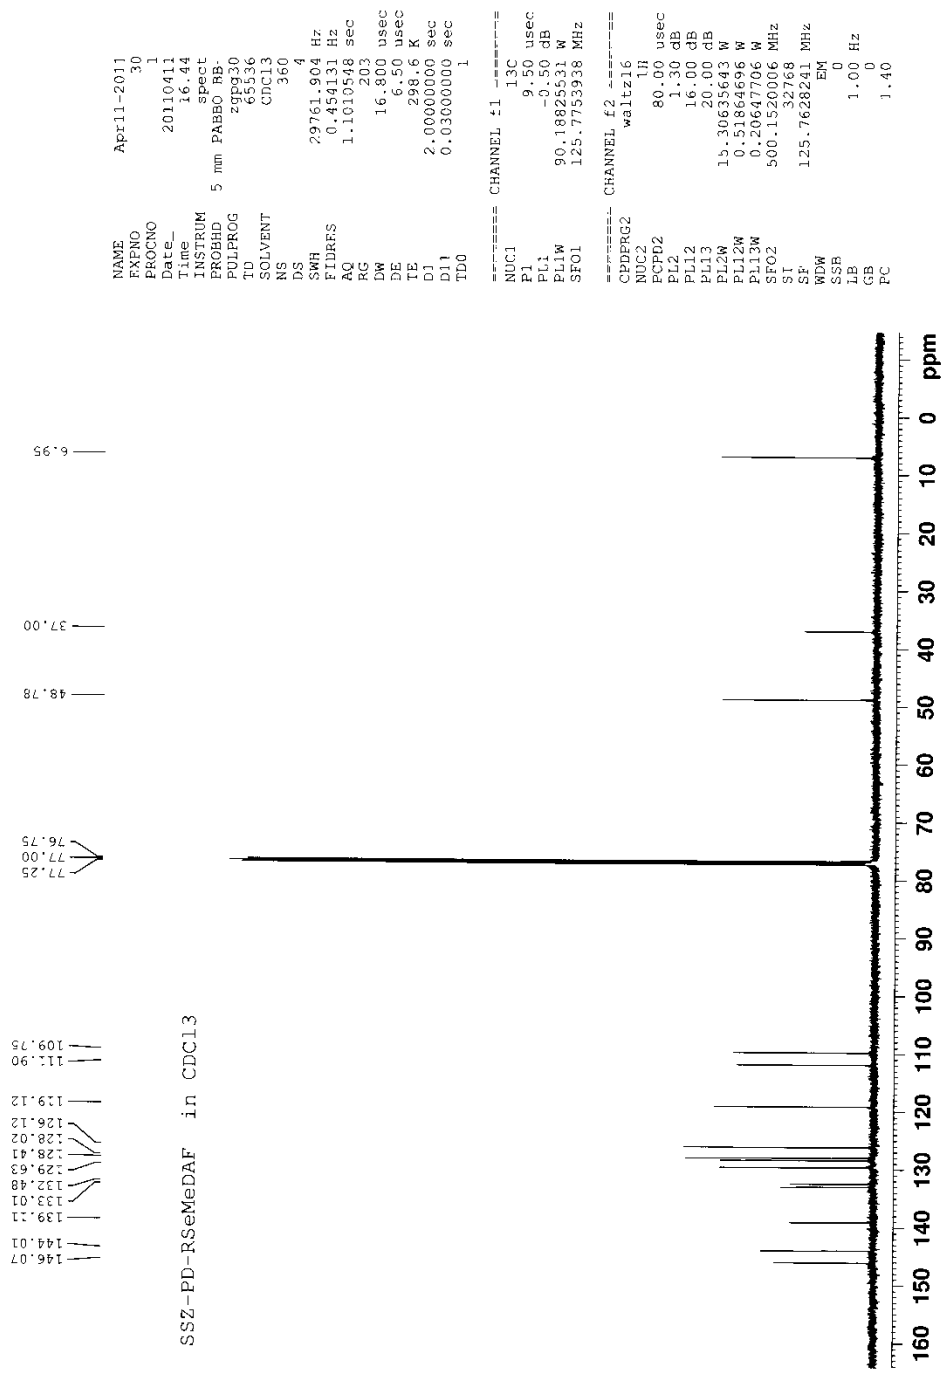

Fig. S4 <sup>13</sup>C NMR spectrum of reduced podand 4.

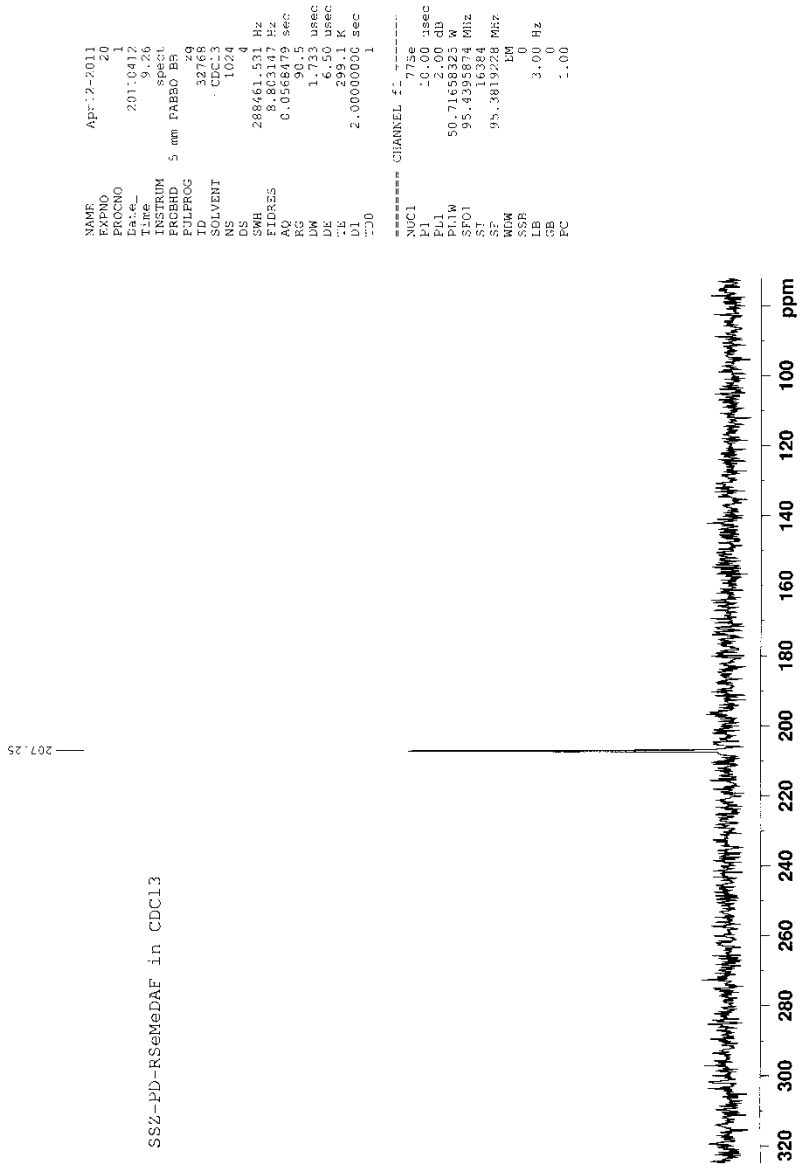

Fig. S5 <sup>77</sup>Se NMR spectrum of reduced podand 4.

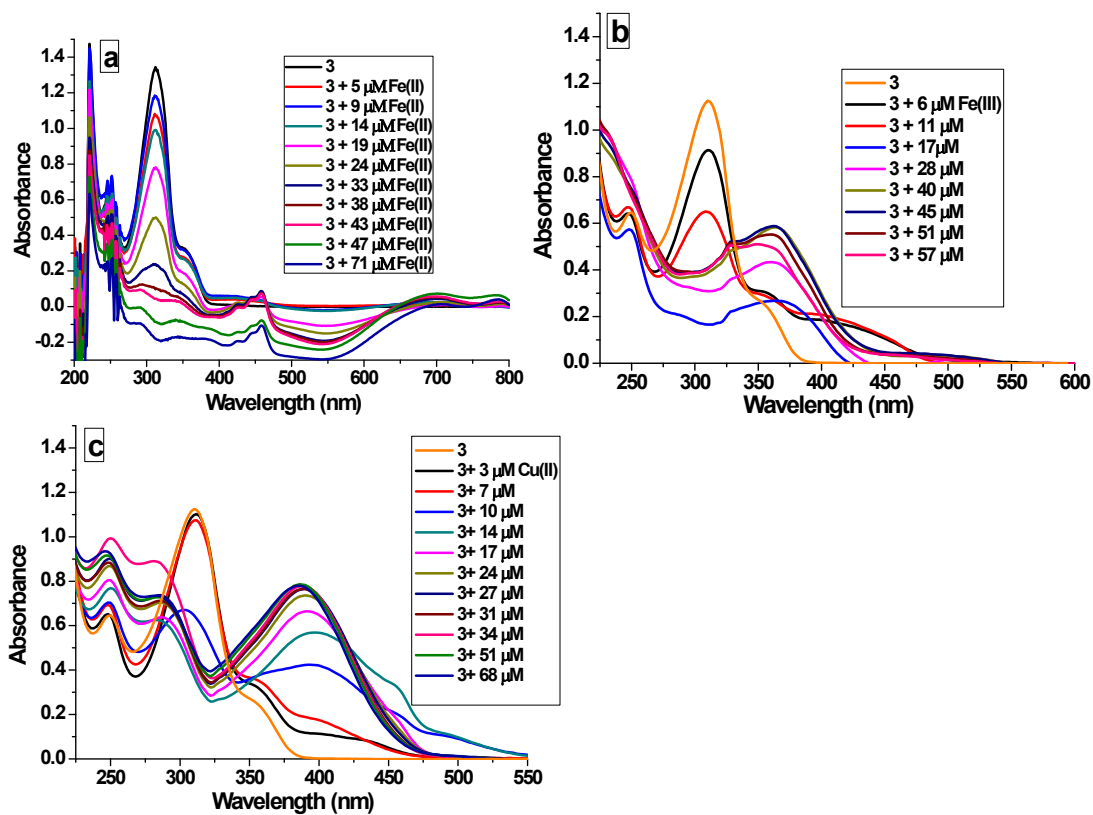

**Fig. S6** Change in absorption spectra upon addition of (a) Fe(II), (b) Fe(III) and (c) Cu(II) solution in THF to the solution of reduced podand **3** (33  $\mu\text{M}$ ).

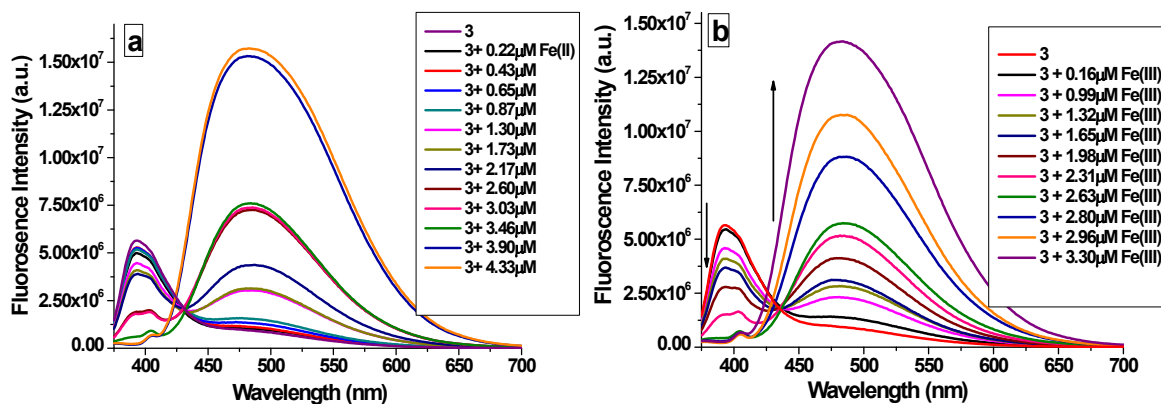

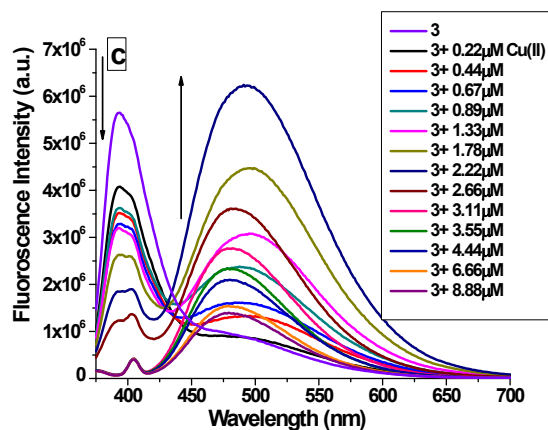

**Fig. S7** Fluorescence response following excitation at 360 nm from reduced podand **3** solution upon addition of (a) Fe(II), (b) Fe(III) and (c) Cu(II) ion in THF.

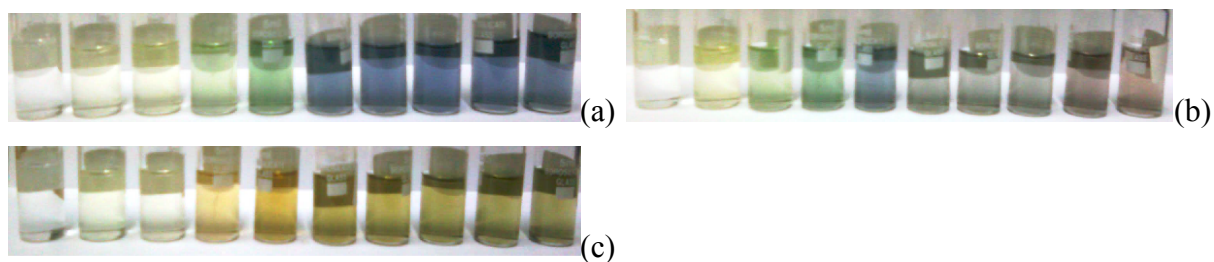

**Fig. S8** Visual Changes in color after addition of aliquots of (a) Fe(II), (b) Fe(III) and (c) Cu(II) ion to the reduced podand **3**.

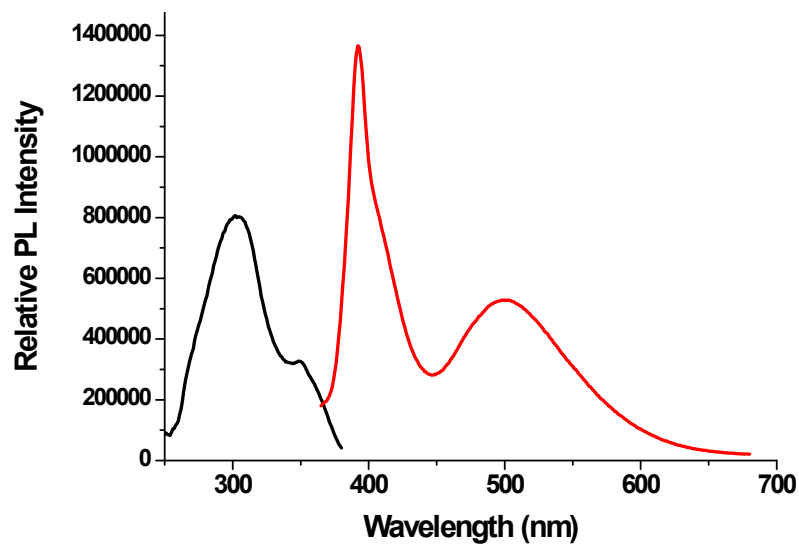

**Fig. S9** Excitation and emission spectra of podand **4**.

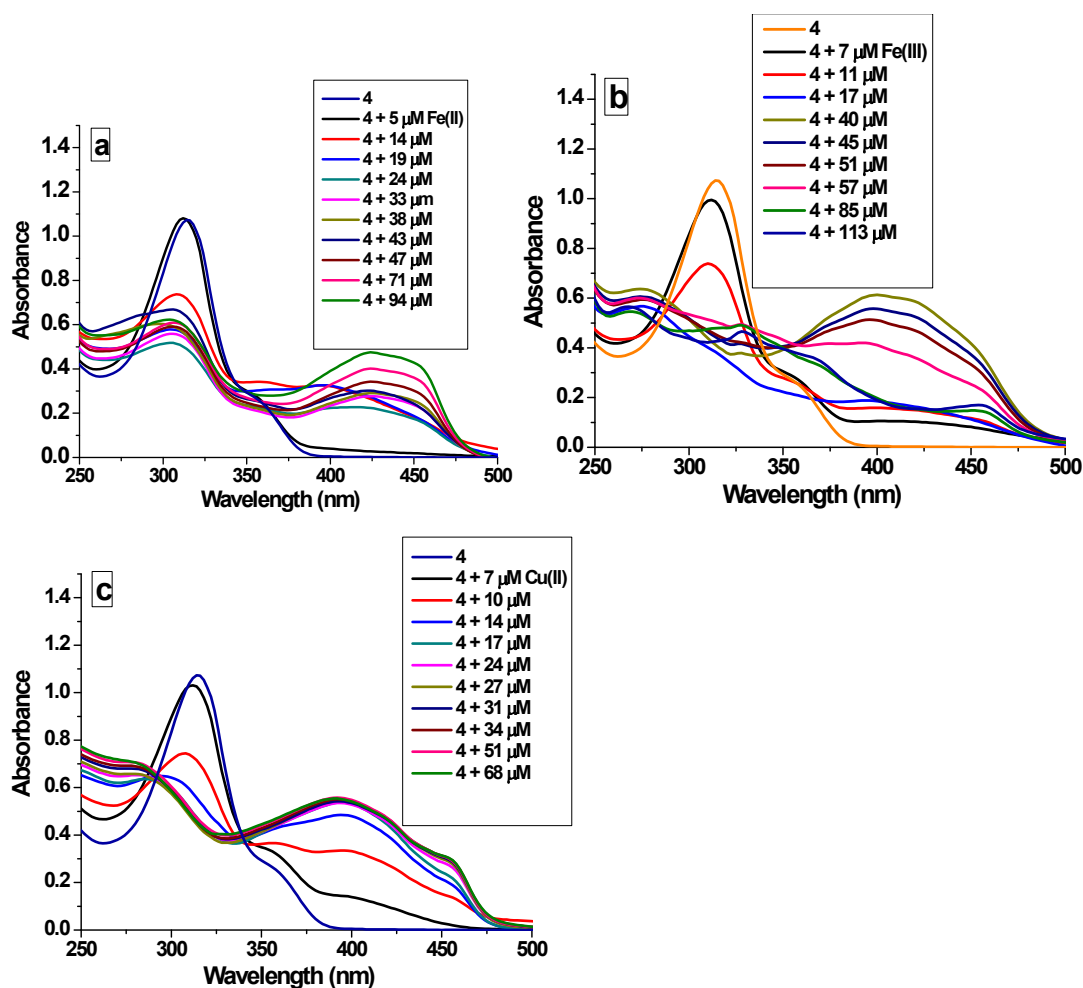

**Fig. S9** Change in absorption spectra upon addition of (a) Fe(II), (b) Fe(III) and (c) Cu(II) solution in THF to the solution of reduced podand 4 (35 μM).

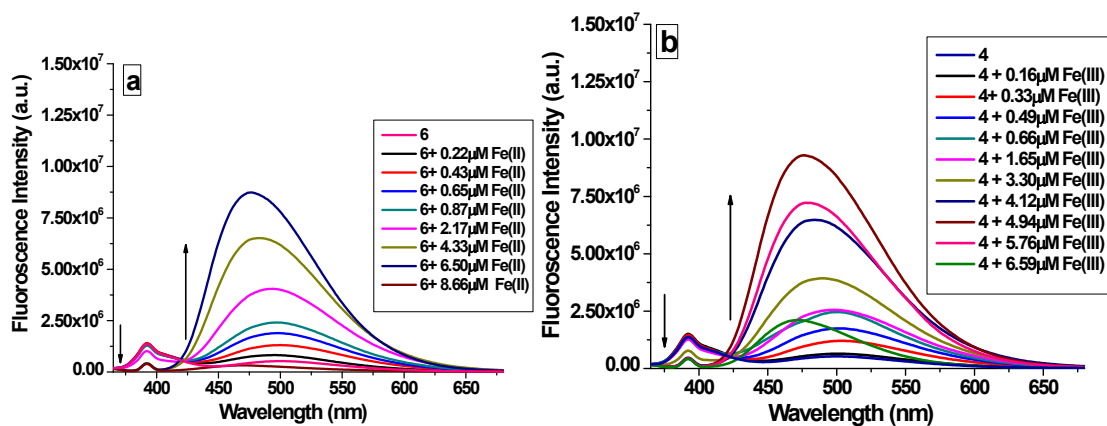

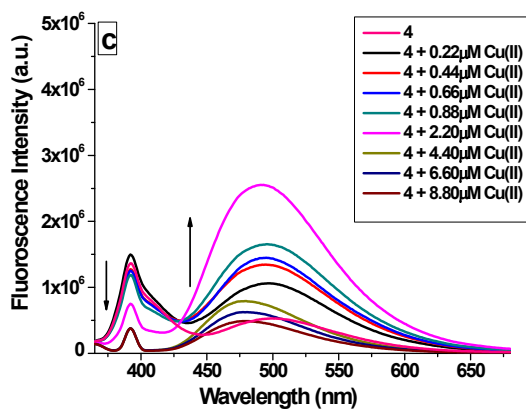

**Fig. S10** Fluorescence response following excitation at 350 nm from reduced podand **4** solution upon addition of (a) Co(II), (b) Fe(II), (c) Fe(III) and (d) Cu(II) ion in THF.

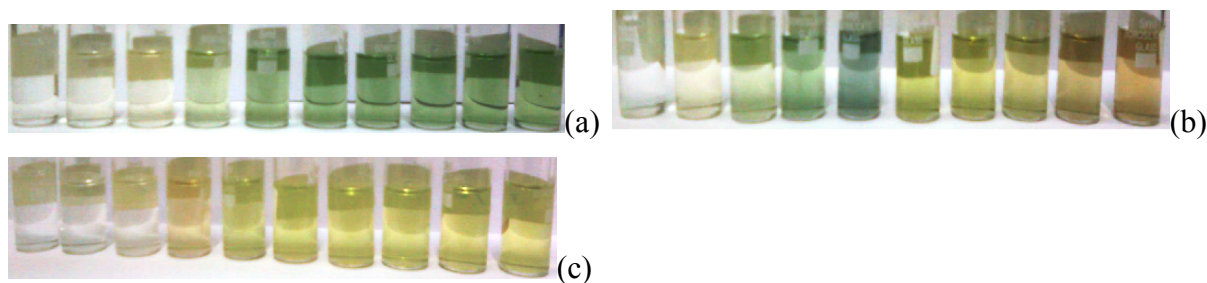

**Fig. S11** Visual Changes in color after addition of aliquots of (a) Co(II), (a) Fe(II), (b) Fe(III) and (c) Cu(II) ion to the reduced podand **4**.

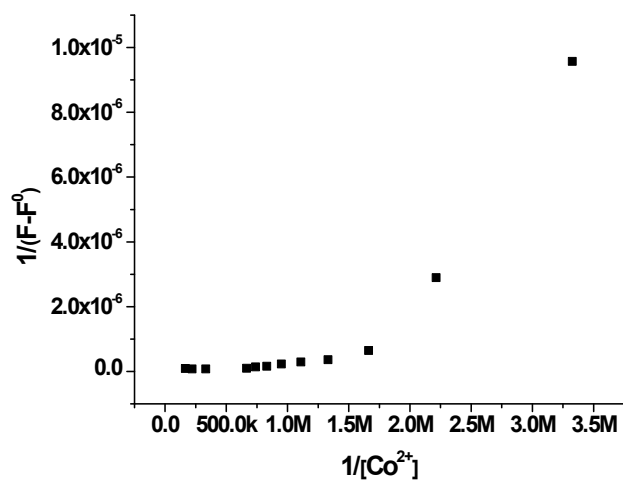

**Fig. S12** Double reciprocal plot for the complexation of podand **3** and Co(II).

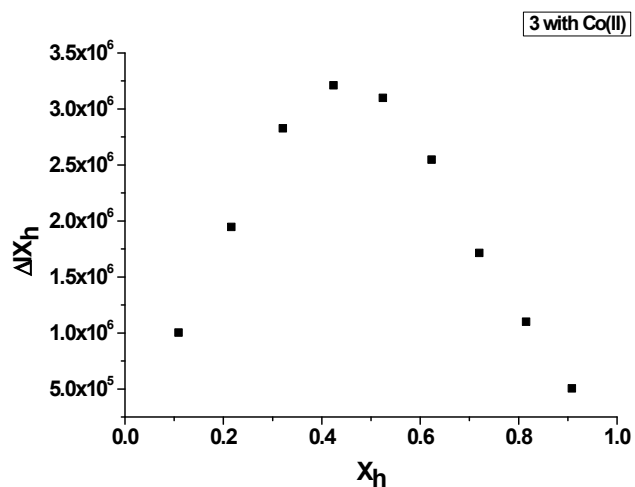

**Fig. S13** Jobs plot of titration of **3** with Co(II) (where  $X_h$  is the mole fraction of Co(II) and  $\Delta I$  indicates the change of the Fluorescence).

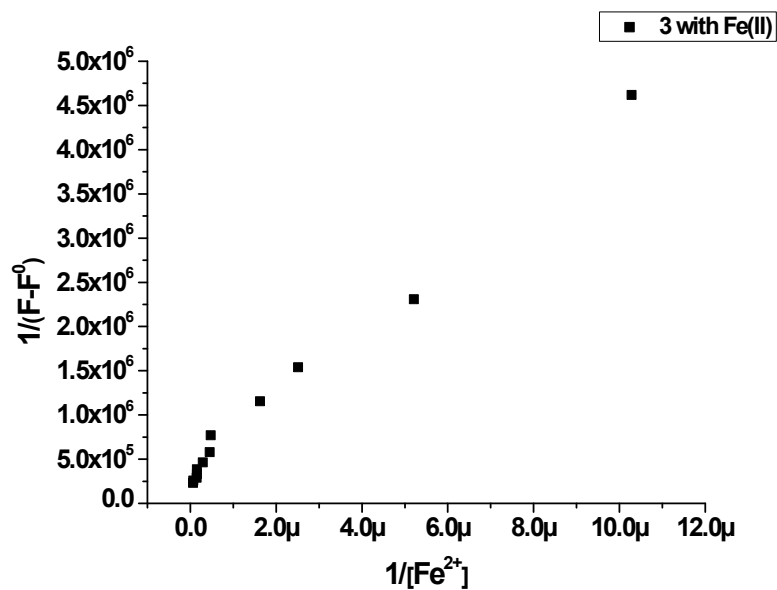

**Fig. S14** Double reciprocal plot for the complexation of podand **3** and Fe(II).

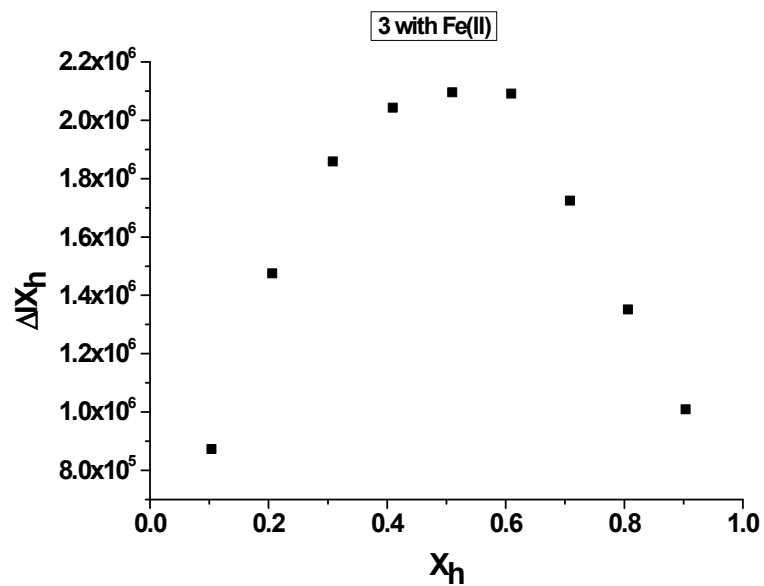

**Fig. S15** Jobs plot of titration of **3** with Fe(II) (where  $X_h$  is the mole fraction of Fe(II) and  $\Delta I$  indicates the change of the Fluorescence).

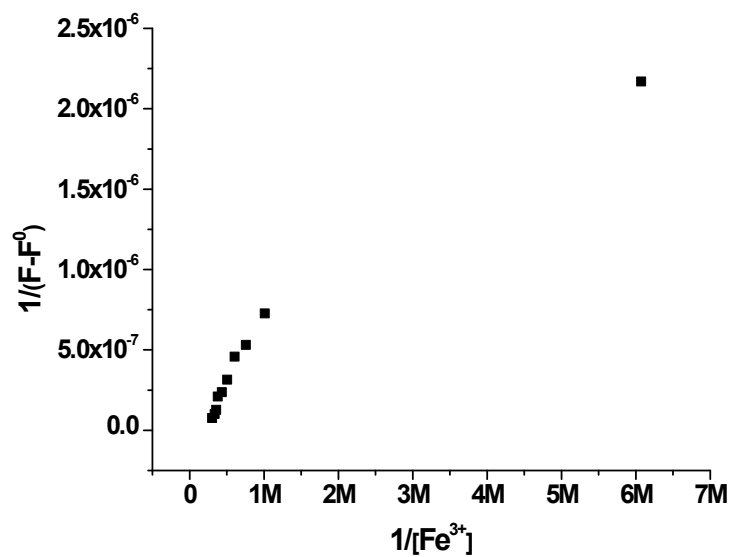

**Fig. S16** Double reciprocal plot for the complexation of podand **3** and Fe(III).



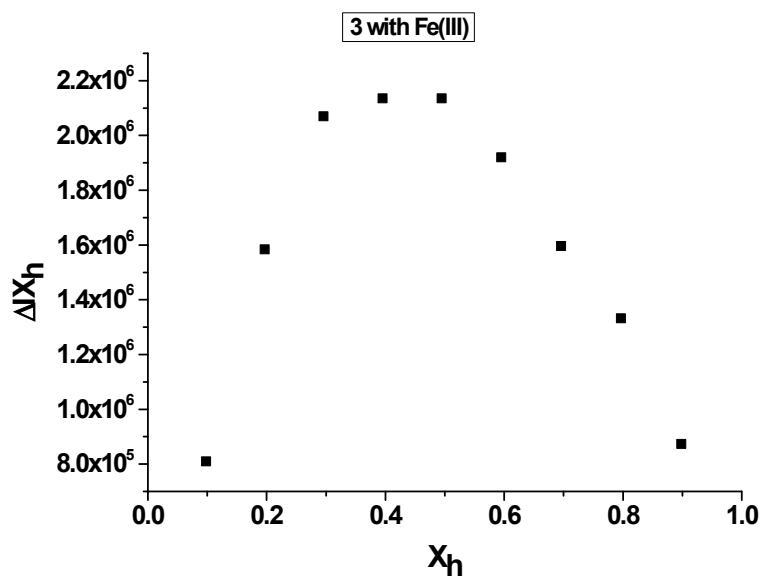

**Fig. S17** Jobs plot of titration of **3** with Fe(III) (where  $X_h$  is the mole fraction of Fe(III) and  $\Delta I$  indicates the change of the Fluorescence).

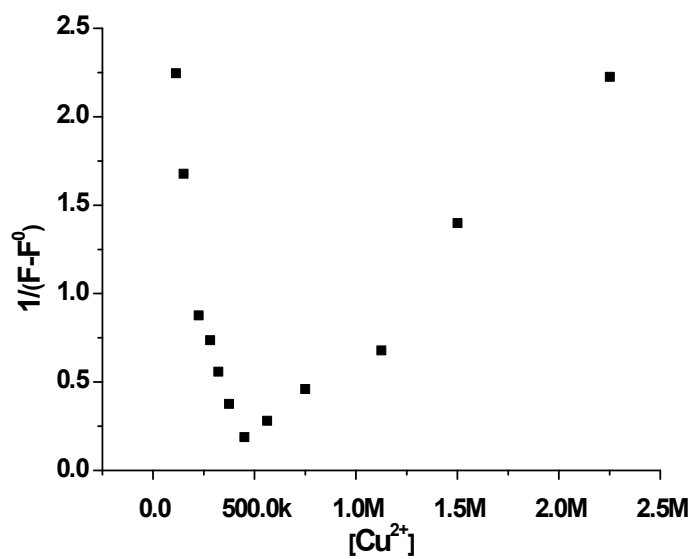

**Fig. S18** Double reciprocal plot for the complexation of podand **3** and Cu(II).

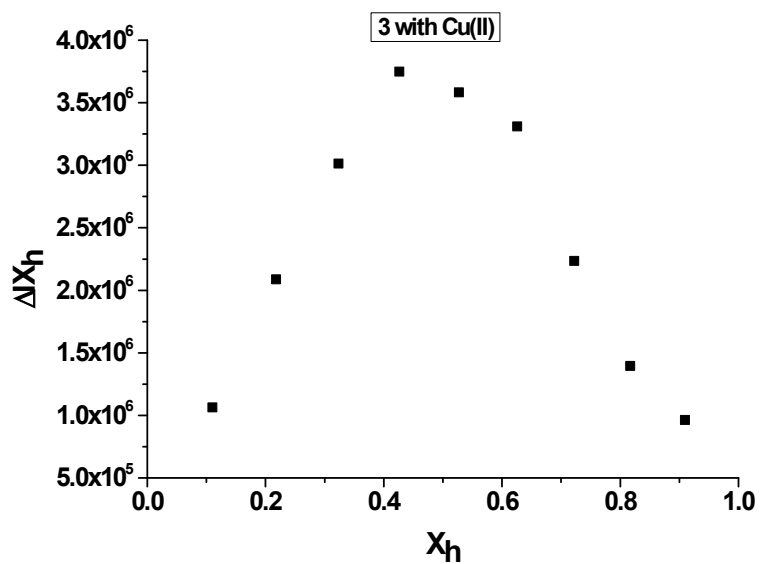

**Fig. S19** Jobs plot of titration of **3** with Cu(II) (where  $X_h$  is the mole fraction of Cu(II) and  $\Delta I$  indicates the change of the Fluorescence).

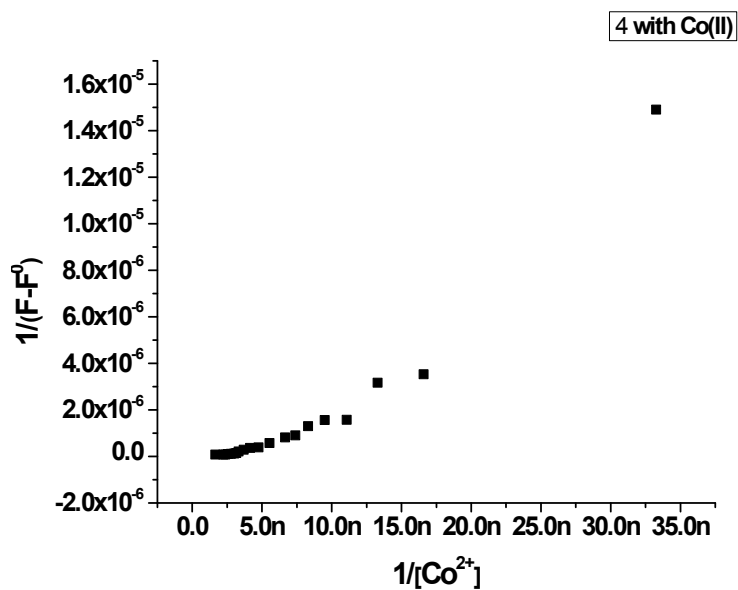

**Fig. S20** Double reciprocal plot for the complexation of podand **4** and Co(II).

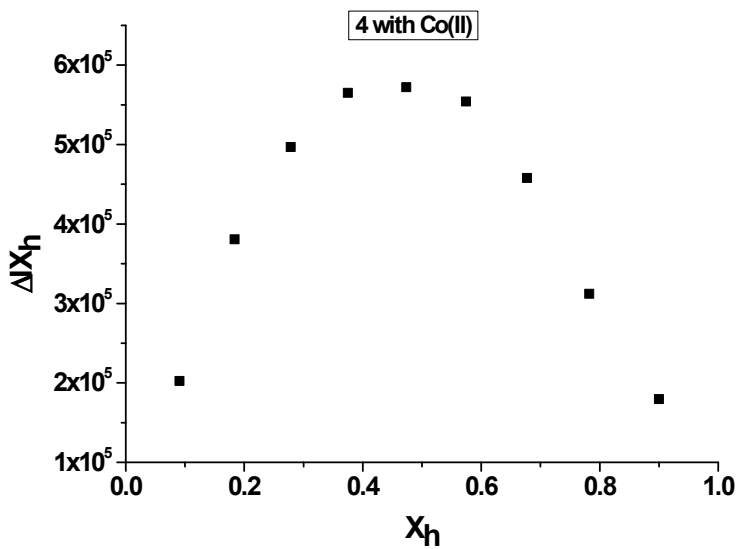

Fig. S21 Jobs plot of titration of 4 with Co(II) (where  $X_h$  is the mole fraction of Co(II) and  $\Delta I$  indicates the change of the Fluorescence).

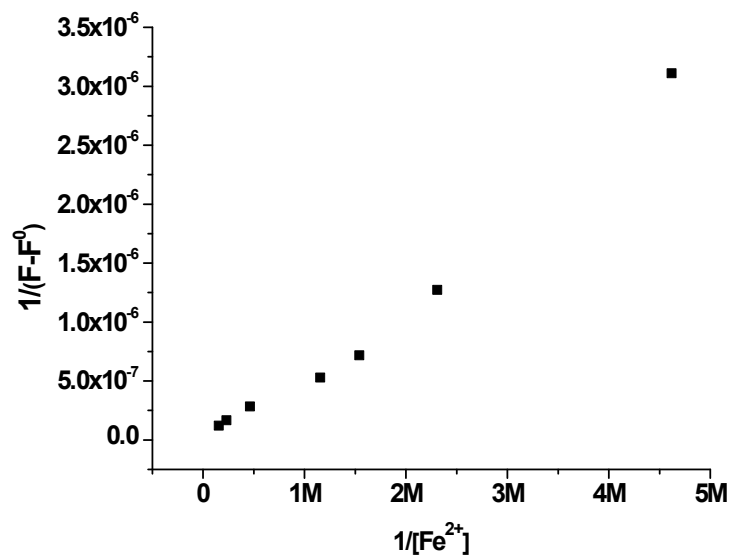

Fig. S22 Double reciprocal plot for the complexation of podand 4 and Fe(II).

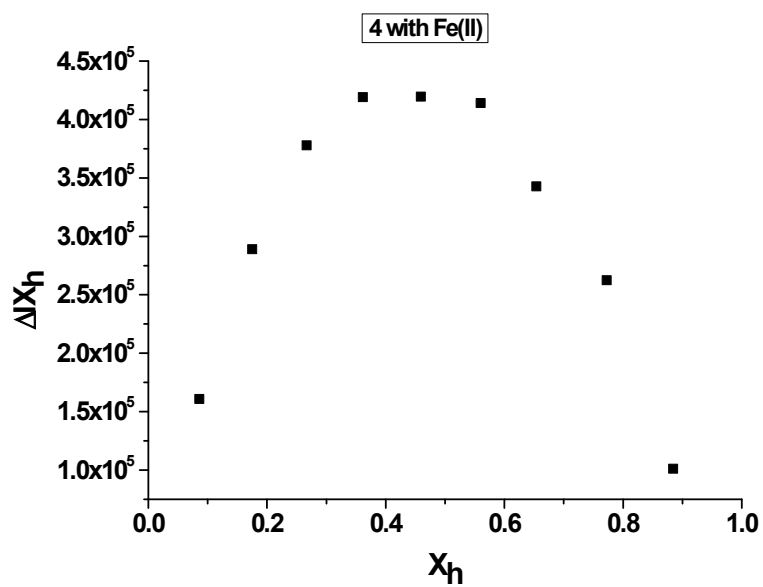

Fig. S23 Jobs plot of titration of 4 with Fe(II) (where  $X_h$  is the mole fraction of Fe(II) and  $\Delta I$  indicates the change of the Fluorescence).

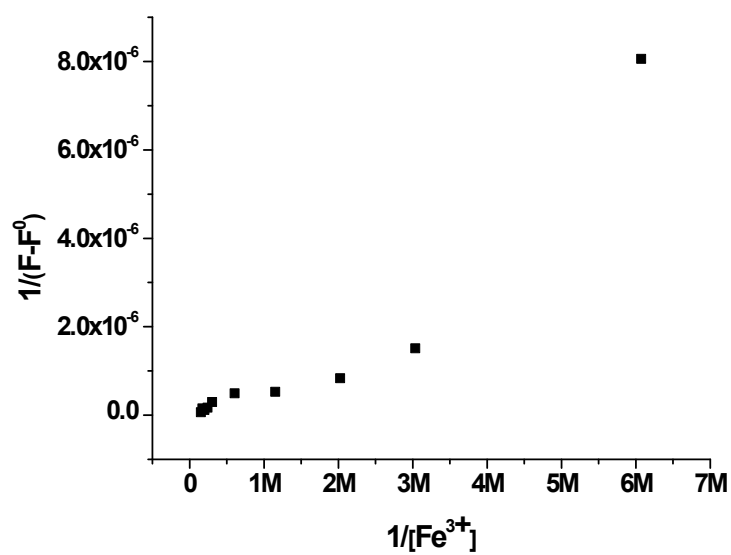

Fig. S24 Double reciprocal plot for the complexation of podand 4 and Fe(III).

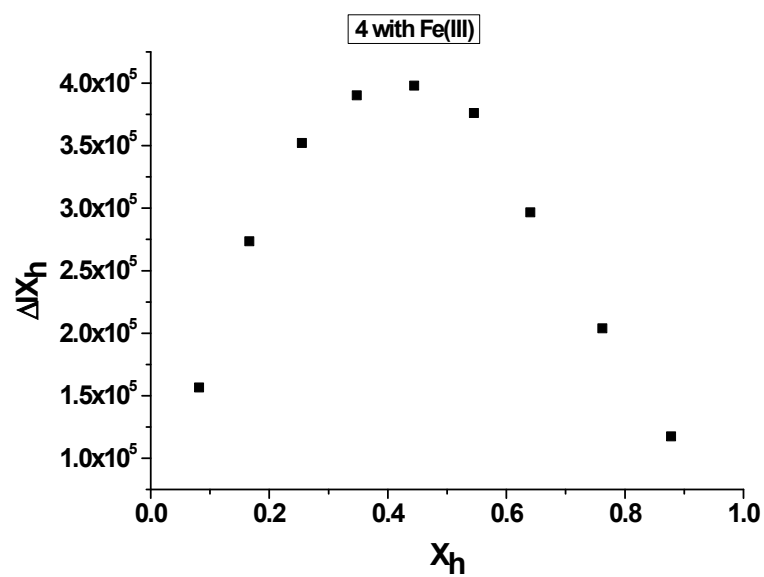

**Fig. S25** Jobs plot of titration of **4** with Fe(III) (where  $X_h$  is the mole fraction of Fe(III) and  $\Delta I$  indicates the change of the Fluorescence).

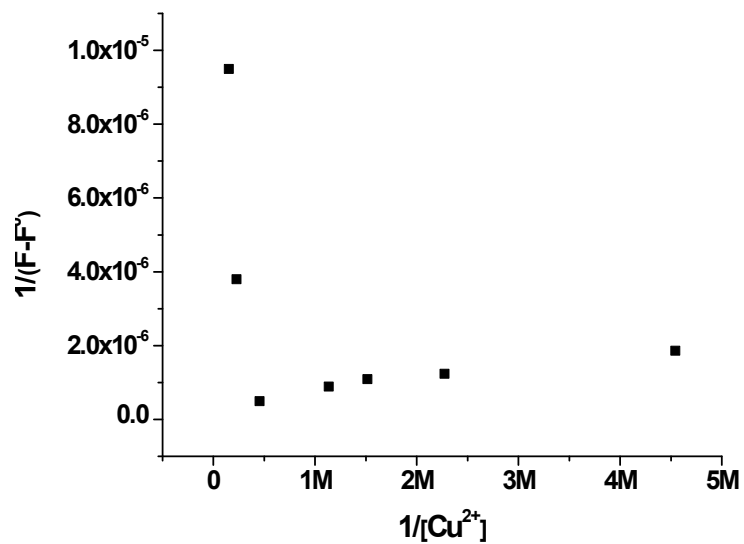

**Fig. S26** Double reciprocal plot for the complexation of podand **4** and Cu(II).

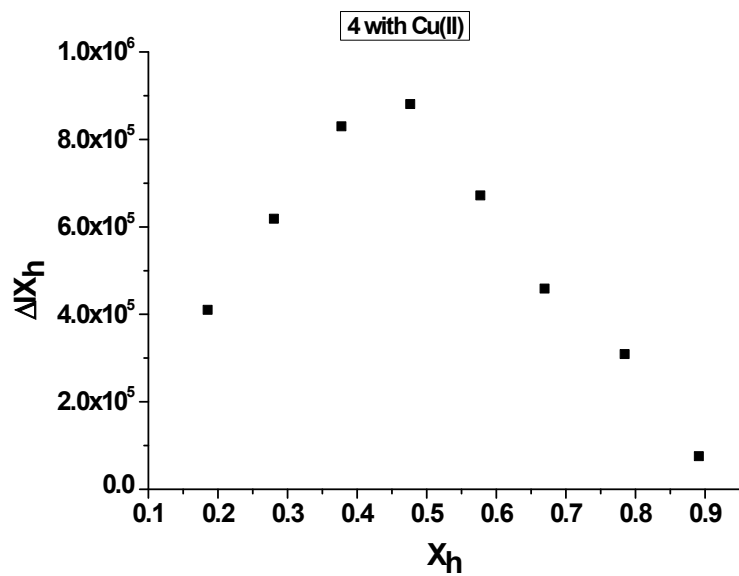

**Fig. S27** Jobs plot of titration of **4** with Cu(II) (where  $X_h$  is the mole fraction of Cu(II) and  $\Delta I$  indicates the change of the Fluorescence).

---

1 S. Panda, P. B. Pati and S. S. Zade, *Chem. Commun.*, 2011, **47**, 4174.
